# Supplementary material for: Efficacy of corticosteroids in non-intensive care unit patients with COVID-19 pneumonia from the New York Metropolitan region
Source: PLoS One. 2020 Sep 9;15(9):e0238827. doi: 10.1371/journal.pone.0238827 (PMC7480842; doi:10.1371/journal.pone.0238827)
Supplement: S1 File — (DOCX) [file pone.0238827.s002.docx]

**S1 File. Calculation of SF ratio and PF ratio**

The SF ratio is calculated by SpO2 (%) divided by FiO2.

FiO2 is estimated for a non-invasive oxygen delivery method in the following way.

1. For nasal cannula - 0.21 for room air, 0.21 + (oxygen flow rate * 0.035)
2. For simple oxygen mask – 0.35 is taken for 6L/min, 0.4 is taken for 7L/min, 0.47 is taken for 8L/min, 0.53 taken for 9L/min, and 0.6 is taken for ≥10L/min1
3. For non-rebreather mask – 0.6 is taken for 6L/min, 0.7 is taken for 7L/min, and 0.8 is taken for ≥8L/min 2,3

The minimum SF ratio was considered out of multiple SF ratio of the same day.

To calculate the PF ratio, for taken SpO2 value, corresponding PaO2 value was imputed that is divide by taken FiO2. 2,3

**References**

1. COVID-19 and O2 therapy. Initial prehospital approach in mild symptomatic patients. | MEDEST. Accessed May 6, 2020. https://medest118.com/2020/03/16/covid-19-and-o2-therapy-initial-prehospital-approach-in-mild-symptomatic-patients/

2. Brown SM, Duggal A, Hou PC, et al. Nonlinear Imputation of PaO2/FIO2 From SpO2/FIO2 Among Mechanically Ventilated Patients in the ICU. *Crit Care Med*. 2017;45(8):1317-1324. doi:10.1097/CCM.0000000000002514

3. Brown SM, Grissom CK, Moss M, et al. Nonlinear Imputation of PaO2/FIO2 From SpO2/FIO2 Among Patients With Acute Respiratory Distress Syndrome. *Chest*. 2016;150(2):307-313. doi:10.1016/j.chest.2016.01.003
